# Supplementary material
Source: publisher figshare collection journal article supplement (https://sage.figshare.com/ndownloader/files/17282774)
Supplement: Supplementary file 1 [file 17282774]

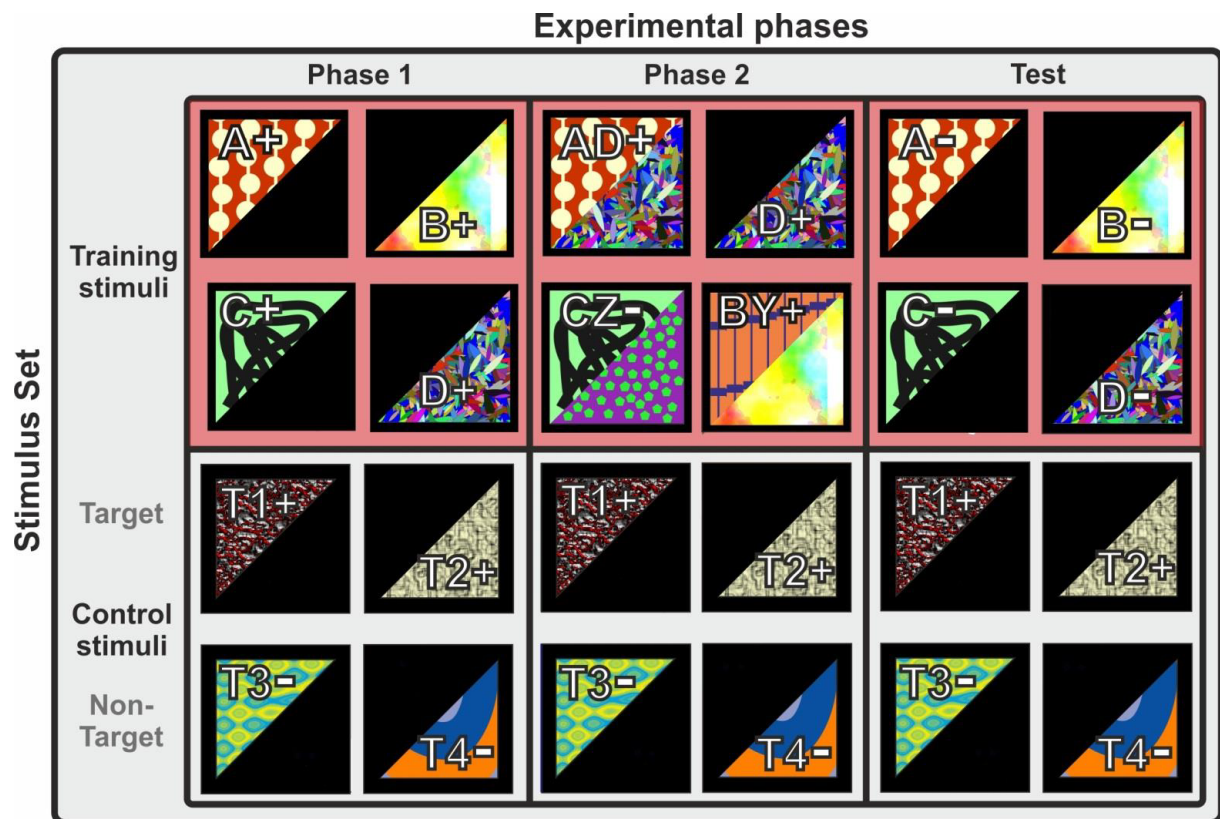

**Supplementary figure 2.** Stimulus set 2 used for the other set of pigeons in Experiment 1. Note the differences between stimulus sets 1 and 2. For this set, entirely different pictures for all training stimuli were used. Furthermore, the orientations for all training stimuli were mirrored. If stimulus A+ was presented in the bottom right for one half of animals (as shown here), the other half was presented with A+ in the top left position. For control stimuli, the target stimuli were exchanged with the non-target stimuli from one set to the other.
